# Supplementary material for: Complement and coagulation cascades activation is the main pathophysiological pathway in early-onset severe preeclampsia revealed by maternal proteomics
Source: PubMed Central journal article supplement (PMC7862439; doi:10.1038/s41598-021-82733-z), 2021-02-04
Supplement: 41598_2021_82733_MOESM2_ESM.pdf [file 41598_2021_82733_MOESM2_ESM.pdf]

## **Complement and coagulation cascades activation is the main pathophysiological pathway in early-onset severe preeclampsia revealed by maternal proteomics**

Lina Youssef<sup>1</sup>; Jezid Miranda<sup>1</sup>; Miquel Blasco<sup>2</sup>; Cristina Paules<sup>1</sup>; Francesca Crovetto<sup>1</sup>; Marta Palomo<sup>3,4,5</sup>; Sergi Torramade-Moix<sup>4</sup>; Héctor García-Calderó<sup>6,7</sup>; Olga Tura-Ceide<sup>8,9,10</sup>, Ana Paula Dantas<sup>11</sup>; Virginia Hernandez-Gea<sup>6,7</sup>; Pol Herrero<sup>12</sup>; Nuria Canela<sup>12</sup>; Josep Maria Campistol<sup>2,13</sup>; Joan Carles Garcia-Pagan<sup>6,7</sup>; Maribel Diaz-Ricart<sup>4,5</sup>; Eduard Gratacos<sup>1,13\*</sup>; Fatima Crispi<sup>1,13</sup>

<sup>1</sup>BCNatal | Fetal Medicine Research Center (Hospital Clínic and Hospital Sant Joan de Déu), Institut d'Investigacions Biomèdiques August Pi i Sunyer (IDIBAPS), University of Barcelona, Barcelona, Spain.

<sup>2</sup>Nephrology and Renal Transplantation Department, Hospital Clínic, Centro de Referencia en Enfermedad Glomerular Compleja del Sistema Nacional de Salud (CSUR), University of Barcelona, Barcelona, Spain.

<sup>3</sup>Josep Carreras Leukaemia Research Institute, Hospital Clinic, University of Barcelona Campus, Barcelona, Spain.

<sup>4</sup>Hematopathology, Centre Diagnòstic Biomèdic (CDB), Hospital Clinic, Institut d'Investigacions Biomèdiques August Pi i Sunyer (IDIBAPS), University of Barcelona, Barcelona, Spain.

<sup>5</sup>Barcelona Endothelium Team (BET).

<sup>6</sup>The Barcelona Hepatic Hemodynamics Laboratory, Liver Unit, Hospital Clinic, Institut d'Investigacions Biomèdiques August Pi i Sunyer (IDIBAPS), University of Barcelona, Barcelona, Spain.

<sup>7</sup>Centro de Investigación Biomédica en Red de Enfermedades Hepáticas y Digestivas (CIBEREHD), Barcelona, Spain.

<sup>8</sup>Department of Pulmonary Medicine, Hospital Clínic, Institut d'Investigacions Biomèdiques August Pi i Sunyer (IDIBAPS), University of Barcelona, Barcelona, Spain.

<sup>9</sup>Biomedical Research Networking Center on Respiratory Diseases (CIBERES), Madrid, Spain.

<sup>10</sup>Girona Biomedical Research Institute – IDIBGI, Girona, Spain.

<sup>11</sup>Cardiovascular Institute, Hospital Clínic, Institut d'Investigacions Biomèdiques August Pi i Sunyer (IDIBAPS), University of Barcelona, Barcelona, Spain.

<sup>12</sup>Eurecat, Centre Tecnològic de Catalunya, Centre for Omic Sciences (COS), Joint Unit Universitat Rovira i Virgili-EURECAT, Unique Scientific and Technical Infrastructures (ICTS), Reus, Spain.

<sup>13</sup>Centre for Biomedical Research on Rare Diseases (CIBER-ER), Madrid, Spain.

*\*Corresponding author:* Eduard Gratacós, Department of Maternal–Fetal Medicine (ICGON), Hospital Clínic, Sabino de Arana 1, 08028, Barcelona, Spain (e-mail: [gratacos@clinic.cat](mailto:gratacos@clinic.cat))

## Supplementary Information

### Methods

#### *Proteomics analysis*

Before proteomic analysis, the depletion of the seven most abundant serum proteins (Albumin, Immunoglobulin G, antitrypsin, Immunoglobulin A, transferrin, haptoglobin and fibrinogen) was performed to increase the number of identified proteins. 12  $\mu$ l of each sample were passed twice through the Human-7 Multiple Affinity Removal Spin cartridge from Agilent Technologies and the flow through fractions were collected for proteomic analysis following manufacturer's protocol. 30  $\mu$ g of total protein (quantified by Bradford's method) were reduced with 4mM 1,4-Dithiothreitol for 1h at 37°C and alkylated with 8 mM iodoacetamide for 30 min at 25°C in the dark. Afterwards, samples were overnight digested (pH 8.0, 37°C) with sequencing-grade trypsin (Promega) at enzyme:protein ratio of 1:50. Digestion was quenched by acidification with 1% (v/v) formic acid and peptides were desalted on Oasis HLB SPE column (Waters) before tandem mass tag (TMT) 10-plex labelling (Thermo Fisher) following manufacturer's instructions.

To normalize all samples along the different TMT-multiplexed batches, a pool containing all the samples was included in each TMT batch. TMT 10-plex batches were desalted on Oasis HLB SPE columns before the nanoscale liquid chromatography coupled to tandem mass spectrometry (nanoLC-MS/MS) analysis.

Labelled and multiplexed samples were on-line fractionated in a strong cation exchange (SCX) nano-column (Agilent) by gradient salt pulsed sequential elution using ammonium acetate (NH<sub>4</sub>AcO). Thus, 6 fractions were analyzed for each TMT-plex using 0, 12.5, 25, 50, 100 and 500 mM NH<sub>4</sub>AcO. Each SCX fraction eluted were desalted on a trap nano-column (100  $\mu$ m I.D.; 2cm length; 5 $\mu$ m particle diameter, Thermo Fisher Scientific, San José, CA, USA) and separated onto a C-18 reversed phase (RP) nano-column (75 $\mu$ m I.D.; 15cm length;

3 $\mu$ m particle diameter, Nikkyo Technos Co. LTD, Japan) on an EASY-II nano LC from Thermo Fisher. The chromatographic separation was performed with a 90 min gradient using Milli-Q water (0.1% formic acid) and acetonitrile (0.1% formic acid) as mobile phase at a flow rate of 300 nL/min.

Mass spectrometry analyses were performed on an LTQ-Orbitrap Velos Pro from Thermo Fisher by an enhanced FT-resolution MS spectrum (R=30,000 FHMW) followed by a data dependent FT-MS/MS acquisition (R=15,000 FHMW, 40% HCD) from the most intense ten parent ions with a charge state rejection of one and dynamic exclusion of 0.5 min.

#### *Protein identification/quantification*

For protein quantification, the ratios between each TMT-label against the pool label were used and quantification results were normalized based on protein median.

Protein identification/quantification was performed on Proteome Discoverer software v.1.4.0.288 (Thermo Fisher) by Multidimensional Protein Identification Technology (MudPIT). For protein identification, all MS and MS/MS spectra were analyzed using Mascot search engine (v.2.5). Two missed cleavages were allowed and an error of 0.02 Da for FT-MS/MS fragmentation mass and 10.0 ppm for a FT-MS parent ion mass were allowed. TMT-10plex was set as quantification modification and oxidation of methionine and acetylation of N-termini were set as dynamic modifications, whereas carbamidomethylation of cysteine was set as static modifications. The false discovery rate and protein probabilities were calculated by Perclorator.

On initial proteomic analysis, readers were blinded to patient's status.

#### *Statistical analysis*

For proteomics data, statistical approach was performed using Metaboanalyst 4.0 (<http://www.metaboanalyst.ca/>). Only those proteins that were present in  $\geq 70\%$  of the samples in at least one group were considered. To estimate missing values in the included

proteins, we used a Bayesian principal component analysis approach. Then, a log base 2 transformation was applied, and data were mean-centered for univariate analyses and Pareto scaled for multivariate analyses. Initially, a multivariate modelling was performed including the use of unsupervised methods such as principal component analysis (PCA), and supervised methods like partial least squares discriminant analysis (PLS-DA) and an orthogonal projection to latent structures discriminant analysis (OPLS-DA). A variable importance in projection (VIP) plot, which is a visual representation of the importance of the particular proteins in discriminating the groups of interest, is provided. To assess the significance of class discrimination whether it could be due to chance, a permutation test was performed applying 2000 permutations. For the selected model, the goodness of fit (R<sup>2</sup>X) and the predictive performance (Q<sup>2</sup>Y), which relate to the explained and predicted variance respectively, were calculated. All these methods were applied with a Pareto scaling.

Secondly, for each protein a univariate Student's *t*-test was performed and Benjamini-Hochberg method was used to adjust p values for multiple testing with consideration of 5% false discovery rate. An additional unsupervised hierarchical clustering analysis (HCA) was performed based on the univariate results.

Last, differential pathways were identified using a method based on protein-protein interaction networks and enrichment analysis using STRING database 11.00 (<https://string-db.org/>). Significantly different proteins based on the univariate analysis were used for the pathway analyses. The pathway networks were identified by exploring the interactions of pathway-enriched genes with the global human protein-protein interaction (PPI) network from the Search Tool for the Retrieval of Interacting Genes/proteins (STRING) database 11.0 (<https://string-db.org/>). We constructed an extended network based on a high confidence score of 0.7. In addition, an enrichment analysis was performed to identify the corresponding pathways Kyoto Encyclopedia of Genes and Genome (KEGG) database.

## **Results**

The first component explained 16.6% of the variance between cases and controls and consisted mainly of Immunoglobulin heavy constant mu (IGHM), Hemoglobin subunit beta (HBB), Immunoglobulin lambda constant 2 (IGLC2), CD5 antigen-like (CD5L), Immunoglobulin lambda-like polypeptide 5 (IGLL5) which are related to blood pressure regulation, lipid synthesis, apoptosis and immune response. The second component explained 14% of the variance and consisted primarily of Serotransferrin (TRFE), Haptoglobin (HP), Immunoglobulin heavy constant gamma 3 (IGHG3), Pregnancy-specific beta-1-glycoprotein 9 (PSG9), Glutathione peroxidase 3 (GPX3), Corticosteroid-binding globulin (CBG) which have mainly a role in protecting cells from oxidative damage. The third component explained an additional 9.9% of the variance and consisted of Apolipoprotein-a (APOA), Apolipoprotein C-III (APOC3), Apolipoprotein C-II (APOC2) which have a multifaceted role in atherosclerosis, triglyceride homeostasis and lipoproteins metabolism.

**Supplementary Table S1.** Univariate analysis results for each protein. p-value is calculated with t-test as a default. p-value with (W) is calculated by the Wilcoxon Mann Whitney test. q-value is calculated after 5% false discovery rate correction.

| <b>Protein<br/>(Uniprot)</b> | <b>Controls<br/>mean (SD)</b> | <b>Preeclampsia<br/>mean (SD)</b> | <b>p-value</b> | <b>q-value</b> | <b>Preeclampsia<br/>/controls</b> |
|------------------------------|-------------------------------|-----------------------------------|----------------|----------------|-----------------------------------|
| P06681                       | 0.500 (0.245)                 | -0.214 (0.247)                    | < 0.0001       | 0.0008         | Down                              |
| Q9UGM5                       | 0.649 (0.175)                 | -0.278 (0.479)                    | < 0.0001       | 0.0008         | Down                              |
| P02774                       | 0.551 (0.128)                 | -0.236 (0.492)                    | < 0.0001       | 0.0020         | Down                              |
| P02751                       | -0.766 (0.419)                | 0.328 (0.426)                     | < 0.0001       | 0.0020         | Up                                |
| P08185                       | 0.744 (0.289)                 | -0.319 (0.482)                    | < 0.0001       | 0.0030         | Down                              |
| Q06033                       | -0.692 (0.463)                | 0.297 (0.399)                     | 0.0001         | 0.0030         | Up                                |
| P04275                       | -0.783 (0.467)                | 0.336 (0.483)                     | 0.0001         | 0.0030         | Up                                |
| O75636                       | 0.626 (0.345)                 | -0.268 (0.398)                    | 0.0002         | 0.0030         | Down                              |
| P19823                       | -0.550 (0.255)                | 0.236 (0.348)                     | 0.0004 (W)     | 0.0063         | Up                                |
| P22352                       | -0.658 (0.327)                | 0.282 (0.491)                     | 0.0005         | 0.0073         | Up                                |
| P01042                       | 0.472 (0.306)                 | -0.202 (0.385)                    | 0.0013         | 0.0192         | Down                              |
| P19827                       | -0.442 (0.193)                | 0.189 (0.393)                     | 0.0016         | 0.0215         | Up                                |
| P27918                       | 0.553 (0.228)                 | -0.237 (0.505)                    | 0.0019         | 0.0231         | Down                              |
| P01024                       | 0.391 (0.208)                 | -0.168 (0.362)                    | 0.0025         | 0.0286         | Down                              |
| P60709                       | -0.632 (0.516)                | 0.271 (0.589)                     | 0.0044         | 0.0431         | Up                                |
| P02760                       | -0.487 (0.273)                | 0.209 (0.519)                     | 0.0046 (W)     | 0.0431         | Up                                |
| P00740                       | -0.336 (0.185)                | 0.144 (0.436)                     | 0.0046 (W)     | 0.0431         | Up                                |
| P05546                       | 0.570 (0.358)                 | -0.244 (0.621)                    | 0.0081         | 0.0711         | Down                              |
| P01019                       | 0.470 (0.429)                 | -0.201 (0.491)                    | 0.0096         | 0.0798         | Down                              |
| P02765                       | 0.502 (0.450)                 | -0.215 (0.545)                    | 0.0112         | 0.0869         | Down                              |

|        |                |                |            |        |      |
|--------|----------------|----------------|------------|--------|------|
| P0COL4 | 0.600 (0.813)  | -0.257 (0.535) | 0.0116     | 0.0869 | Down |
| P02763 | -0.514 (0.615) | 0.220 (0.514)  | 0.0127     | 0.0914 | Up   |
| P01008 | 0.433 (0.587)  | -0.186 (0.414) | 0.0144     | 0.0988 | Down |
| P18428 | 0.498 (0.805)  | -0.214 (0.455) | 0.0205     | 0.1352 | Down |
| P05543 | 0.351 (0.186)  | -0.150 (0.470) | 0.0224     | 0.1414 | Down |
| P01011 | -0.381 (0.401) | 0.163 (0.474)  | 0.0247     | 0.1500 | Up   |
| P08697 | 0.344 (0.340)  | -0.148 (0.443) | 0.0266     | 0.1537 | Down |
| P22692 | -0.338 (0.577) | 0.145 (0.326)  | 0.0272     | 0.1537 | Up   |
| P02655 | -0.439 (0.657) | 0.188 (0.684)  | 0.0326 (W) | 0.1660 | Up   |
| Q96PD5 | -0.177 (0.181) | 0.076 (0.519)  | 0.0326 (W) | 0.1660 | Up   |
| P02787 | 0.711 (0.954)  | -0.305 (0.875) | 0.0326 (W) | 0.1660 | Down |
| Q15582 | 0.346 (0.424)  | -0.148 (0.480) | 0.0431     | 0.2129 | Down |
| P06396 | 0.263 (0.188)  | -0.113 (0.604) | 0.0505     | 0.2369 | Down |
| P02750 | 0.336 (0.487)  | -0.144 (0.465) | 0.0510     | 0.2369 | Down |
| Q13790 | 0.350 (0.361)  | -0.150 (0.548) | 0.0566     | 0.2555 | Down |
| P0COL5 | 0.507 (0.361)  | -0.217 (0.848) | 0.0621     | 0.2726 | Down |
| Q92954 | -0.391 (0.589) | 0.167 (0.579)  | 0.0650     | 0.2776 | Up   |
| P00747 | 0.244 (0.144)  | -0.105 (0.577) | 0.0695 (W) | 0.2823 | Down |
| P22792 | -0.305 (0.460) | 0.131 (0.407)  | 0.0757 (W) | 0.2823 | Up   |
| Q00887 | 0.477 (0.311)  | -0.204 (1.092) | 0.0757 (W) | 0.2823 | Down |
| Q13219 | -0.596 (1.030) | 0.255 (0.789)  | 0.0757 (W) | 0.2823 | Up   |
| P51884 | -0.286 (0.345) | 0.123 (0.506)  | 0.0761 (W) | 0.2823 | Up   |
| Q96IY4 | -0.242 (0.175) | 0.104 (0.434)  | 0.0794     | 0.2823 | Up   |
| P02790 | 0.264 (0.266)  | -0.113 (0.463) | 0.0805     | 0.2823 | Down |
| P09871 | -0.218 (0.165) | 0.093 (0.396)  | 0.0834     | 0.2823 | Up   |



|        |                |                |            |        |      |
|--------|----------------|----------------|------------|--------|------|
| Q9BXR6 | 0.256 (0.225)  | -0.110 (0.663) | 0.0836     | 0.2823 | Down |
| Q16610 | 0.354 (0.302)  | -0.152 (0.643) | 0.0853     | 0.2823 | Down |
| P02743 | -0.348 (0.440) | 0.149 (0.600)  | 0.0858     | 0.2823 | Up   |
| P02656 | -0.447 (0.410) | 0.192 (0.813)  | 0.0876     | 0.2823 | Up   |
| P01860 | 0.626 (1.406)  | -0.268 (0.836) | 0.0913     | 0.2885 | Down |
| P05160 | 0.296 (0.272)  | -0.127 (0.581) | 0.1091     | 0.3379 | Down |
| P05154 | 0.303 (0.479)  | -0.130 (0.568) | 0.1205     | 0.3660 | Down |
| Q03591 | 0.464 (0.426)  | -0.199 (0.955) | 0.1241     | 0.3699 | Down |
| O43866 | 0.232 (0.499)  | -0.100 (0.927) | 0.1297 (W) | 0.3775 | Down |
| P27169 | -0.322 (0.665) | 0.138 (0.568)  | 0.1314     | 0.3775 | Up   |
| P00751 | 0.278 (0.642)  | -0.119 (0.471) | 0.1384     | 0.3893 | Down |
| P10909 | -0.247 (0.355) | 0.106 (0.507)  | 0.1404     | 0.3893 | Up   |
| P10643 | -0.254 (0.426) | 0.109 (0.517)  | 0.1500     | 0.4087 | Up   |
| P43251 | 0.296 (0.406)  | -0.127 (0.616) | 0.1528 (W) | 0.4093 | Down |
| P07357 | 0.224 (0.448)  | -0.096 (0.452) | 0.1631     | 0.4232 | Down |
| P15169 | -0.256 (0.568) | 0.110 (0.496)  | 0.1634     | 0.4232 | Up   |
| Q14624 | 0.194 (0.223)  | -0.083 (0.456) | 0.1783     | 0.4545 | Down |
| Q9Y6R7 | -0.332 (0.533) | 0.142 (0.756)  | 0.1821     | 0.4568 | Up   |
| O75882 | 0.200 (0.202)  | -0.086 (0.496) | 0.1942     | 0.4770 | Down |
| P08519 | -0.447 (1.155) | 0.191 (0.907)  | 0.1994     | 0.4770 | Up   |
| P20742 | -0.486 (1.089) | 0.208 (1.063)  | 0.1999     | 0.4770 | Up   |
| P04196 | 0.247 (0.524)  | -0.106 (0.556) | 0.2023     | 0.4770 | Down |
| P00742 | -0.039 (0.184) | 0.017 (0.765)  | 0.2074 (W) | 0.4778 | Up   |
| P02647 | -0.195 (0.418) | 0.084 (0.445)  | 0.2087     | 0.4778 | Up   |
| P08603 | 0.206 (0.268)  | -0.088 (0.649) | 0.2158 (W) | 0.4872 | Down |

|        |                |                |            |        |      |
|--------|----------------|----------------|------------|--------|------|
| P01034 | -0.223 (0.564) | 0.096 (0.524)  | 0.2382     | 0.5301 | Up   |
| P0DOY2 | 0.412 (1.022)  | -0.177 (0.992) | 0.2437     | 0.5339 | Down |
| P04003 | 0.332 (0.779)  | -0.142 (0.831) | 0.2497     | 0.5339 | Down |
| Q96KN2 | -0.230 (0.413) | 0.098 (0.620)  | 0.2534     | 0.5339 | Up   |
| P04264 | 0.334 (1.178)  | -0.143 (0.657) | 0.2566     | 0.5339 | Down |
| P04278 | 0.274 (0.637)  | -0.117 (0.706) | 0.2584     | 0.5339 | Down |
| P00746 | -0.174 (0.359) | 0.074 (0.471)  | 0.2655     | 0.5339 | Up   |
| P80108 | 0.222 (0.514)  | -0.095 (0.586) | 0.2668     | 0.5339 | Down |
| P02768 | -0.356 (0.976) | 0.153 (0.435)  | 0.2670     | 0.5339 | Up   |
| P14151 | 0.195 (0.587)  | -0.084 (0.491) | 0.2867     | 0.5662 | Down |
| P07359 | 0.203 (0.721)  | -0.087 (0.483) | 0.3011     | 0.5873 | Down |
| P05155 | -0.112 (0.360) | 0.048 (0.497)  | 0.3119 (W) | 0.5937 | Up   |
| P02753 | -0.101 (0.581) | 0.043 (0.798)  | 0.3119 (W) | 0.5937 | Up   |
| P17936 | -0.123 (0.204) | 0.053 (0.561)  | 0.3198     | 0.6015 | Up   |
| P03952 | 0.179 (0.682)  | -0.077 (0.454) | 0.3335     | 0.6200 | Down |
| P55058 | -0.317 (1.039) | 0.136 (0.316)  | 0.3392     | 0.6231 | Up   |
| P55056 | -0.277 (0.714) | 0.119 (0.873)  | 0.3434     | 0.6236 | Up   |
| P02746 | 0.133 (0.483)  | -0.057 (0.378) | 0.3536     | 0.6350 | Down |
| B9A064 | 0.280 (0.508)  | -0.120 (1.002) | 0.3697     | 0.6563 | Down |
| P02748 | 0.151 (0.652)  | -0.065 (0.403) | 0.3748     | 0.6580 | Down |
| P00450 | -0.130 (0.328) | 0.056 (0.484)  | 0.4067     | 0.7061 | Up   |
| P81605 | -0.288 (1.410) | 0.123 (0.853)  | 0.4278     | 0.7347 | Up   |
| P02775 | -0.099 (0.172) | 0.043 (0.609)  | 0.4348     | 0.7386 | Up   |
| P49747 | 0.126 (0.514)  | -0.054 (0.462) | 0.4490     | 0.7492 | Down |
| P02776 | -0.152 (0.286) | 0.065 (0.662)  | 0.4542     | 0.7492 | Up   |

|        |                |                |            |        |      |
|--------|----------------|----------------|------------|--------|------|
| P04114 | 0.170 (0.624)  | -0.073 (0.665) | 0.4559     | 0.7492 | Down |
| P02649 | -0.155 (0.738) | 0.067 (0.553)  | 0.4655     | 0.7492 | Up   |
| P43652 | -0.142 (0.448) | 0.061 (0.604)  | 0.4720     | 0.7492 | Up   |
| P68871 | 0.240 (0.556)  | -0.103 (1.077) | 0.4733     | 0.7492 | Down |
| P05090 | -0.147 (0.442) | 0.063 (0.635)  | 0.4742     | 0.7492 | Up   |
| P12259 | -0.149 (0.796) | 0.064 (0.515)  | 0.4802     | 0.7512 | Up   |
| P69905 | 0.188 (1.033)  | -0.081 (0.692) | 0.5010     | 0.7658 | Down |
| P01023 | -0.126 (0.528) | 0.054 (0.546)  | 0.5031     | 0.7658 | Up   |
| P06727 | 0.125 (0.348)  | -0.053 (0.592) | 0.5041     | 0.7658 | Down |
| P00736 | -0.028 (0.319) | 0.012 (0.496)  | 0.5092 (W) | 0.7662 | Up   |
| P01871 | 0.226 (0.847)  | -0.097 (1.047) | 0.5146     | 0.7671 | Down |
| P02652 | -0.099 (0.629) | 0.042 (0.349)  | 0.5234     | 0.7729 | Up   |
| Q14520 | 0.138 (0.400)  | -0.059 (0.715) | 0.5365     | 0.7849 | Down |
| P02747 | 0.139 (0.445)  | -0.059 (0.693) | 0.5466 (W) | 0.7871 | Down |
| P02671 | -0.139 (0.761) | 0.059 (0.622)  | 0.5480     | 0.7871 | Up   |
| Q15848 | -0.133 (0.783) | 0.057 (0.613)  | 0.5666     | 0.8065 | Up   |
| P05156 | -0.077 (0.454) | 0.033 (0.361)  | 0.5720     | 0.8070 | Up   |
| P04180 | -0.115 (0.317) | 0.049 (0.670)  | 0.5775     | 0.8075 | Up   |
| Q9Y5Y7 | -0.126 (0.826) | 0.054 (0.668)  | 0.6132     | 0.8364 | Up   |
| P49908 | -0.094 (0.591) | 0.040 (0.509)  | 0.6137     | 0.8364 | Up   |
| P00738 | 0.310 (1.953)  | -0.133 (0.910) | 0.6140     | 0.8364 | Down |
| P35858 | -0.090 (0.344) | 0.038 (0.588)  | 0.6274     | 0.8465 | Up   |
| P06276 | -0.078 (0.268) | 0.034 (0.543)  | 0.6408     | 0.8465 | Up   |
| P01031 | 0.061 (0.349)  | -0.026 (0.401) | 0.6503     | 0.8465 | Down |
| P48740 | -0.076 (0.471) | 0.033 (0.488)  | 0.6513     | 0.8465 | Up   |

|        |                |                |            |        |      |
|--------|----------------|----------------|------------|--------|------|
| Q9UK55 | 0.087 (0.326)  | -0.037 (0.631) | 0.6572     | 0.8465 | Down |
| O95445 | 0.086 (0.574)  | -0.037 (0.550) | 0.6582     | 0.8465 | Down |
| P02745 | 0.099 (0.369)  | -0.042 (0.598) | 0.6590 (W) | 0.8465 | Down |
| O14791 | -0.091 (0.357) | 0.039 (0.760)  | 0.6979     | 0.8727 | Up   |
| P19652 | -0.070 (0.453) | 0.030 (0.544)  | 0.6980     | 0.8727 | Up   |
| P08571 | 0.069 (0.615)  | -0.029 (0.480) | 0.7035     | 0.8727 | Down |
| P11464 | -0.189 (1.674) | 0.081 (0.647)  | 0.7162     | 0.8727 | Up   |
| P02749 | -0.153 (0.726) | 0.066 (0.635)  | 0.7181 (W) | 0.8727 | Up   |
| P36980 | 0.061 (0.973)  | -0.026 (0.650) | 0.7181 (W) | 0.8727 | Down |
| Q04756 | -0.066 (0.432) | 0.028 (0.642)  | 0.7181 (W) | 0.8727 | Up   |
| P03951 | 0.062 (0.266)  | -0.027 (0.579) | 0.7253     | 0.8748 | Down |
| P07996 | 0.078 (0.678)  | -0.033 (0.724) | 0.7518     | 0.8999 | Down |
| P29622 | 0.059 (0.649)  | -0.025 (0.309) | 0.7734     | 0.9187 | Down |
| P23142 | -0.062 (0.562) | 0.027 (0.663)  | 0.7794     | 0.9190 | Up   |
| P00734 | 0.038 (0.314)  | -0.016 (0.444) | 0.7894     | 0.9239 | Down |
| P36955 | -0.041 (0.346) | 0.018 (0.496)  | 0.7970     | 0.9260 | Up   |
| P02654 | -0.103 (0.265) | 0.044 (0.649)  | 0.8045 (W) | 0.9278 | Up   |
| P01834 | 0.068 (0.574)  | -0.029 (0.982) | 0.8247     | 0.9443 | Down |
| Q9NZP8 | -0.030 (0.399) | 0.013 (0.489)  | 0.8514     | 0.9634 | Up   |
| P04004 | -0.022 (0.173) | 0.009 (0.561)  | 0.8537     | 0.9634 | Up   |
| P04217 | 0.082 (0.135)  | -0.035 (0.497) | 0.8689 (W) | 0.9643 | Down |
| Q08380 | 0.042 (0.695)  | -0.018 (0.781) | 0.8731     | 0.9643 | Down |
| P11226 | -0.032 (0.324) | 0.014 (1.038)  | 0.8835     | 0.9643 | Up   |
| P20061 | 0.029 (0.528)  | -0.012 (0.642) | 0.8916     | 0.9643 | Down |
| P02766 | 0.023 (0.545)  | -0.010 (0.466) | 0.8922     | 0.9643 | Down |

|        |                |                |            |        |      |
|--------|----------------|----------------|------------|--------|------|
| P25311 | -0.027 (0.465) | 0.011 (0.681)  | 0.9023     | 0.9643 | Up   |
| P13671 | 0.050 (0.315)  | -0.021 (0.548) | 0.9044 (W) | 0.9643 | Down |
| P05452 | 0.013 (0.412)  | -0.005 (0.486) | 0.9044 (W) | 0.9643 | Down |
| P26927 | -0.021 (0.602) | 0.009 (0.546)  | 0.9158     | 0.9643 | Up   |
| P02741 | 0.037 (1.263)  | -0.016 (1.058) | 0.9241     | 0.9643 | Down |
| P61626 | 0.020 (0.605)  | -0.009 (0.628) | 0.9244     | 0.9643 | Down |
| P07225 | 0.019 (0.360)  | -0.008 (0.655) | 0.9276     | 0.9643 | Down |
| P07358 | 0.012 (0.320)  | -0.005 (0.529) | 0.9417     | 0.9725 | Down |
| P00748 | 0.150 (0.182)  | -0.064 (0.741) | 0.9680 (W) | 0.9913 | Down |
| P07360 | 0.005 (0.452)  | -0.002 (0.397) | 0.9725     | 0.9913 | Down |
| P16070 | 0.004 (0.432)  | -0.002 (0.666) | 0.9842     | 0.9963 | Down |
| P04070 | -0.002 (0.254) | 0.001 (0.622)  | 0.9921     | 0.9963 | Up   |
| P35542 | -0.001 (0.732) | 0.000 (0.564)  | 0.9963     | 0.9963 | Up   |

**Supplementary Table S2.** Other proteins that were identified in less than 70% of the samples and thus excluded from statistical analysis.

| <b>Protein (Uniprot)</b> |        |        |            |        |        |
|--------------------------|--------|--------|------------|--------|--------|
| P00739                   | P13645 | P41222 | Q92820     | P15144 | Q9BPX3 |
| Q13046                   | P35527 | Q02985 | Q9BWP8     | P01591 | Q9NPR2 |
| P0DJI8                   | Q9UHG3 | Q99969 | O14786     | P03950 | P59665 |
| P35908                   | P01780 | Q6NT52 | P61769     | P09486 | Q96QP1 |
| P0DJI9                   | P22891 | O00391 | A0A0A0MRZ8 | P09327 | P31151 |
| Q15238                   | Q9UNN8 | P24592 | Q9HDC9     | P01344 | P11021 |
| Q06141                   | P33151 | P62328 | P54108     | P07195 | Q9C0I1 |
| P13727                   | Q9UQ72 | P06702 | Q9NQZ6     | Q5SYB0 | P17174 |
| Q6EMK4                   | P01876 | P13796 | P05109     | Q9ULH1 | Q9NQ79 |
| Q6UXB8                   | P40197 | P33908 | Q12933     | P0DML2 | Q13201 |
| Q15113                   | P32119 | P04075 | Q8WW22     | Q92974 | Q6Q759 |
| Q8WU03                   | O76031 | P98160 | P39060     | Q5VUG0 | P21817 |
| O00187                   | O00541 | Q9NPH3 | Q13093     | Q9BYX2 | O15061 |
| Q13103                   | Q86VB7 | P19320 | Q13683     | O95236 | Q92626 |
| P05121                   | Q9H2A2 | O43299 | Q8N3J5     | P11908 | Q99996 |
| Q16627                   | P01619 | Q86UD1 | P22460     | Q00532 |        |
| Q16853                   | Q8TC59 | Q15485 | Q9NPJ8     | Q14207 |        |
| Q12805                   | P24043 | Q8IZC4 | P36575     | Q8ND07 |        |
| P01880                   | O00533 | P43403 | P62714     | Q96JI7 |        |
| P00709                   | P09172 | O75822 | P80188     | Q9UPN9 |        |
